# Supplementary material for: Seismic seiche-related oscillations in Lake Biwa, Japan, after the 2011 Tohoku earthquake
Source: PubMed Central journal article supplement (PMC9652454; doi:10.1038/s41598-022-23939-7), 2022-11-11
Supplement: 41598_2022_23939_MOESM3_ESM.pdf [file 41598_2022_23939_MOESM3_ESM.pdf]

Figure A3

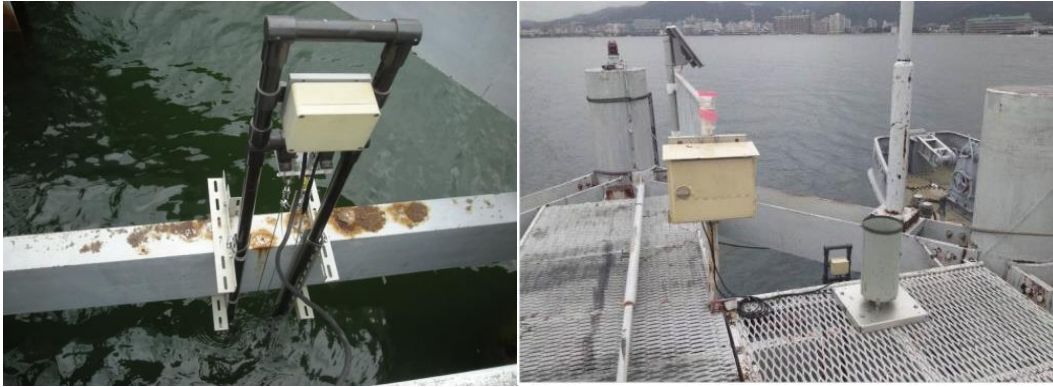

Fig. A3. Photos of the water level gauge (left) and observation site (right) with rain and water level gauges deployed at the Yanagasaki pier.
