# Supplementary material for: Seismic seiche-related oscillations in Lake Biwa, Japan, after the 2011 Tohoku earthquake
Source: PubMed Central journal article supplement (PMC9652454; doi:10.1038/s41598-022-23939-7), 2022-11-11
Supplement: 41598_2022_23939_MOESM5_ESM.pdf [file 41598_2022_23939_MOESM5_ESM.pdf]

Table A1 Previous studies on the surface seiches of Lake Biwa<sup>[16]</sup>.

| Investigator                      | Year |      | Period (min) |          |           |          |          | Others        |
|-----------------------------------|------|------|--------------|----------|-----------|----------|----------|---------------|
|                                   |      |      | Mode- I      | Mode- II | Mode- III | Mode- IV | Mode- V  |               |
| Nakamura & Honda                  | 1911 | Obs. | 231.2        | 72.6     |           |          | 30.5     | 25.2,<br>22.7 |
|                                   |      | Ex.  |              |          |           |          |          |               |
| Suda et al<br>(Kobe Mar. Observ.) | 1926 | Obs. | 242.0        | 71.0     |           | 36-37    | 30.0     | 25–<br>22, 15 |
| Takaya                            | 1931 | Obs. | 236.2        |          |           |          |          |               |
| Nomitsu                           | 1935 | Obs. | 250.0        | 68.4     |           |          | 30.0     | 20,<br>12, 5  |
| Takahashi                         | 1935 | Cal. | 208.0        | 68.0     |           |          |          |               |
| Nomitsu et al.                    | 1937 | Obs. |              |          |           |          |          | 18–<br>15, 5  |
| Toyohara & Habu                   | 1938 | Obs. |              | 66.0     |           |          | 32.0     |               |
| Takahashi & Namekawa              | 1938 | Obs. | 220.0        |          |           |          |          |               |
| Imasato                           | 1970 | Cal. | 212.0        | 71.3     | 61.0      | 37.0     | 32.3     |               |
| Imasato                           | 1971 | Cal. | 255.5        | 79.8     | 69.1      |          |          |               |
|                                   |      | Obs. | 243.9        | 74.1     | 65.1      |          |          |               |
| Imasato                           | 1972 | Cal. |              |          |           | 38.7     | 31.9     | 51.1          |
|                                   |      | Obs. | 232.3        | 74.1     | 66.4      | 40.2     | 32.6     |               |
| Imasato                           | 1973 | Obs. | 229.8        | 72.7     | 65.1      | 40.1     | 30.5     |               |
| Mean                              |      | Obs. | 229.8±12.2   | 72.2±2.2 | 65.1±1.5  | 40.1±0.6 | 30.5±0.8 |               |
|                                   |      | Cal. | 255.5        | 79.8     | 69.1      | 38.7     | 31.9     |               |

Obs. = Observation, Ex.=Experiment, Cal.= Calculation
